# Supplementary material for: Acid dyeing for green solvent processing of solvent resistant semiconducting organic thin films
Source: Royal Society of Chemistry journal article supplement (doi:10.1039/d0mh00785d), 2020-01-01
Supplement: d0mh00785d1.pdf [file d0mh00785d1.pdf]

# Acid Dyeing for Green Solvent Processing of Solvent Resistant Semiconducting Organic Thin Films

## SUPPORTING INFORMATION

Cayley R. Harding,<sup>a</sup> Jonathan Cann,<sup>a</sup> Audrey Laventure,<sup>a</sup> Mozhgan Sadeghianlemraski,<sup>b</sup> Marwa Abd-Ellah,<sup>a,b</sup> Keerthan R. Rao,<sup>d</sup> Benjamin Sidney Gelfand,<sup>a</sup> Hany Aziz,<sup>b</sup> Loren Kaake,<sup>c</sup> Chad Risko,<sup>d</sup> Gregory C. Welch<sup>a\*</sup>

<sup>a</sup> Department of Chemistry, University of Calgary, 2500 University Drive N.W., Calgary, Alberta, Canada, T2N 1N4

<sup>b</sup> Department of Electrical and Computer Engineering, University of Waterloo, Waterloo, Ontario, Canada, N2L 3G1

<sup>c</sup> Department of Chemistry, Simon Fraser University, Vancouver, British Columbia, Canada, V5A 1S6

<sup>d</sup> Department of Chemistry & Center for Applied Energy Research, University of Kentucky, Lexington, Kentucky, USA, 40506

\*E-mail : [gregory.welch@ucalgary.ca](mailto:gregory.welch@ucalgary.ca)

### Table of Contents

|                                                                 |             |
|-----------------------------------------------------------------|-------------|
| <b>Materials and methods</b>                                    | <b>S-2</b>  |
| <b>Crystal data and structure refinement</b>                    | <b>S-3</b>  |
| <b>Computational methods</b>                                    | <b>S-4</b>  |
| <b>General coating parameters</b>                               | <b>S-5</b>  |
| <b>OPV information</b>                                          | <b>S-7</b>  |
| <b>Solubility images and reversibility tests</b>                | <b>S-8</b>  |
| <b>Dip tests and film exposure to butylamine vapors</b>         | <b>S-9</b>  |
| <b>Printing from butylamine</b>                                 | <b>S-10</b> |
| <b>Solvent resistant tests of films printed from butylamine</b> | <b>S-11</b> |
| <b>Safety comment and hazards information - Appendix S1</b>     | <b>S-12</b> |
| <b>References</b>                                               | <b>S-13</b> |

## **1. Materials and Methods**

**UV-Visible Spectroscopy (UV-Vis):** Measurements were recorded using an Agilent Technologies Cary 60 UV-Vis spectrometer at room temperature. All solution UV-Vis experiments were run using 10 mm quartz cuvettes. Films were spin-coated onto PET substrates.

**Atomic Force Microscopy (AFM):** AFM measurements were performed by using a TT2- AFM (AFM Workshop) in tapping mode and WSxM software with a tip at a resonance frequency of 300 kHz, a force constant of 40 N/m and a reflective back side aluminum coating (Tap300Al-G, BudgetSensors).

**Optical Light Microscopy:** Images were taken using a BX53 Olympus Scope.

**Single Crystal X-ray Crystallography:** Single crystals of  $C_{34}H_{29}N_3O_4$  **PDIN-H** were grown by vapour diffusion at room temperature of methanol into a solution of **PDIN-H** in dioxane. A suitable crystal was selected and mounted on a glass loop using Paratone oil. Diffraction experiments were performed on a Bruker Smart diffractometer equipped with an Incoatec Microfocus (Cu  $K\alpha$ ,  $\lambda = 1.54178 \text{ \AA}$ ) and an APEX II CCD detector. The crystal was kept at 173 K during data collection. Diffractions spots were integrated and scaled with SAINT<sup>1</sup> and the space group was determined with XPREP<sup>2</sup>. Using Olex2,<sup>3</sup> the structure was solved with the ShelXT<sup>4</sup> structure solution program using Intrinsic Phasing and refined with the ShelXL<sup>5</sup> refinement package using Least Squares minimisation.

**Table S1. Crystal data and structure refinement for PDIN-H**

|                                             |                                                               |
|---------------------------------------------|---------------------------------------------------------------|
| Empirical formula                           | C <sub>34</sub> H <sub>29</sub> N <sub>3</sub> O <sub>4</sub> |
| Formula weight                              | 543.60                                                        |
| Temperature/K                               | 173                                                           |
| Crystal system                              | monoclinic                                                    |
| Space group                                 | P2 <sub>1</sub> /c                                            |
| a/Å                                         | 18.2166(7)                                                    |
| b/Å                                         | 18.5973(10)                                                   |
| c/Å                                         | 7.8095(2)                                                     |
| α/°                                         | 90                                                            |
| β/°                                         | 97.881(2)                                                     |
| γ/°                                         | 90                                                            |
| Volume/Å <sup>3</sup>                       | 2620.71(19)                                                   |
| Z                                           | 4                                                             |
| ρ <sub>calc</sub> /g/cm <sup>3</sup>        | 1.378                                                         |
| μ/mm <sup>-1</sup>                          | 0.734                                                         |
| F(000)                                      | 1144.0                                                        |
| Crystal size/mm <sup>3</sup>                | 0.358 × 0.11 × 0.086                                          |
| Radiation                                   | CuKα (λ = 1.54178)                                            |
| 2θ range for data collection/°              | 4.898 to 130.452                                              |
| Index ranges                                | -21 ≤ h ≤ 21, -21 ≤ k ≤ 21, -9 ≤ l ≤ 9                        |
| Reflections collected                       | 22039                                                         |
| Independent reflections                     | 4467 [R <sub>int</sub> = 0.0349, R <sub>sigma</sub> = 0.0216] |
| Data/restraints/parameters                  | 4467/0/378                                                    |
| Goodness-of-fit on F <sup>2</sup>           | 1.026                                                         |
| Final R indexes [I >= 2σ (I)]               | R <sub>1</sub> = 0.0581, wR <sub>2</sub> = 0.1587             |
| Final R indexes [all data]                  | R <sub>1</sub> = 0.0639, wR <sub>2</sub> = 0.1639             |
| Largest diff. peak/hole / e Å <sup>-3</sup> | 0.57/-0.29                                                    |

**Computational methods:** All density functional theory (DFT) and time-dependent DFT (TDDFT) calculations were carried in the Gaussian16 (Revision A.03) software suite.<sup>6</sup> The M06 functional<sup>7</sup> was employed with the 6-31G(d,p) Pople basis set.<sup>8-10</sup> Normal mode analyses were carried out for optimized geometries to ensure that no negative frequencies were present. The SMD implicit solvation model<sup>11</sup> was used to compute the fixed concentration free energies of solvation in 1-propanol. The combination of computed free energies and gas phase energies were employed to determine the pK<sub>a</sub>. TDDFT calculations provided the excited-state transitions up to 10 states. Absorption spectra were simulated through convolution of the vertical transition energies and oscillator strengths with Gaussian functions characterized by a full width at half-maximum (fwhm) of 0.33 eV. Pictorial representations of the molecular orbitals were visualized using GaussView 5.0.9.<sup>12</sup>

**Determination of pK<sub>a</sub>.** To calculate the pK<sub>a</sub> of PDINH in solution, we followed the methods described by Ho and co-workers and others, using 1-propanol as the solvent.<sup>13-18</sup> The gas phase free energy of the proton ( $G^0_g(\text{H}^+)$ ) was taken to be  $-26.3424$  kJ/mol,<sup>19</sup> while the proton solvation free energy ( $\Delta G^*_s(\text{H}^+) = -1104.7642$  kJ/mol in 1-propanol) was determined as described by Lee *et al.*<sup>20</sup> and using semi-empirical data.<sup>21-22</sup> Along with the electronic and thermal free energies of the species,<sup>13</sup> the following equations were employed to calculate the pK<sub>a</sub>,

$$\Delta G^*_s = G_{\text{soln}}(\mathbf{R}_1) - G_{\text{gas}}(\mathbf{R}_g)$$

The solution phase and the gas phase geometries are labelled as  $\mathbf{R}_1$  and  $\mathbf{R}_g$  respectively.

$$\Delta G^*_{\text{soln}} = \Delta G^*_{\text{gas}} + \Delta G^*_s(\text{H}^+) + \Delta G^*_s(\text{A}^-) - \Delta G^*_s(\text{HA})$$

$$\text{pK}_a(\text{HA}) = \frac{\Delta G^*_{\text{soln}}}{RT \ln(10)}$$

The pK<sub>a</sub> of a single PDINH molecule optimized in 1-propanol was determined to be 19.7.

**Hydrogen bond strength in the crystal.** The strength of the hydrogen bond of  $\text{NH}\cdots\text{O}=\text{C}$  was determined by computing the electronic and thermal free energies of the dimerized PDINH and single molecule PDINH in the gas phase. The strength of the hydrogen bond was determined using the supramolecular approach,

$$\Delta E_{\text{H-bond}} = E_{\text{stacked\_PDINH}} - (2 \times E_{\text{PDINH}})$$

where,  $\Delta E_{\text{H-bond}}$  is the strength of the  $\text{NH}\cdots\text{O}=\text{C}$  hydrogen bond,  $E_{\text{stacked\_PDINH}}$  is the electronic and thermal free energy of the stacked-PDINH and  $E_{\text{PDINH}}$  is the electronic and thermal free energy of a single PDINH molecule. The binding energy due to the hydrogen bond was determined to be  $-10.14$  kcal/mol.

**General Coating Parameters:** Spin-coated films were coated at room temperature at a speed of 1000 rpm for 60 s. Slot-die coated films were coated using a compact sheet coater from FOM Technologies equipped with a 13 mm wide slot-die head using a solution dispense rate ranging from 90 to 140  $\mu\text{L}/\text{min}$  depending on solvent and a substrate motion speed of 30 cm/min.

Slot-die coating was performed with a FOM compact sheet coater under ambient conditions (A). For coatings the slot-die head was cleaned and assembled with 13 mm shim (B and C), then attached to the sheet coater (D). Approximately 2 mL of solution was loaded into a 5 mL Luer-Lok syringe and needle. The syringe was held upright and air expelled. The needle was removed, and Luer-Lok syringe was connected to P-628 Luer female adapter then attached to 1521 FEP tubing (inner diameter: 1.75 mm) via a P-330X flangeless male nut and P-300X flangeless ferrule (E and F). Solution was pushed  $\frac{3}{4}$  of way through tubing. The loaded syringe and tubing were inserted into syringe holder (G) on pump and the other end of tubing (with a P-330X flangeless male nut and P-300X flangeless ferrule) was attached to the slot die head for the final setup (H). Substrate was loaded onto flatbed (PET – gloss waterproof inkjet film provided from Printing Supplies Direct); dust was removed via a Teknek contact cleaning hand roller. Slot-die head was moved to starting point, lowered (until shim is around 1 cm from substrate) and pump started (2 mL/min until solution was in the slot-die head). Printing conditions of pump dispense rate, length of print, and substrate motion speed were selected, pump dispense rate changing with various solvents, length of print changing according to length required, and substrate speed remaining constant at 30 cm/min. Once optimum dispense rate was selected (known from previous testing), the pump was run until solution followed shim out of the slot-die head, pump was stopped, and meniscus was formed with substrate (by lowering slot-die head). Amount dispensed was zeroed on machine, pump was turned on followed immediately by the movement of the substrate. After coating the pump would be stopped about 1s before the substrate finished moving to prevent significant pooling of the ink. The slot-die head was raised to break meniscus and moved accordingly to repeat process on another part of substrate if required. All substrates were allowed at least 30 minutes to dry on flatbed before removal, cut to 1.5 cm x 1.5 cm samples after an hour, and allowed to dry in petri dishes overnight in drawer before being subject to analysis. For slot-die coated solvent resistant tests neat solvents were loaded into a cleaned syringe and coated directly on top of previously coated films.

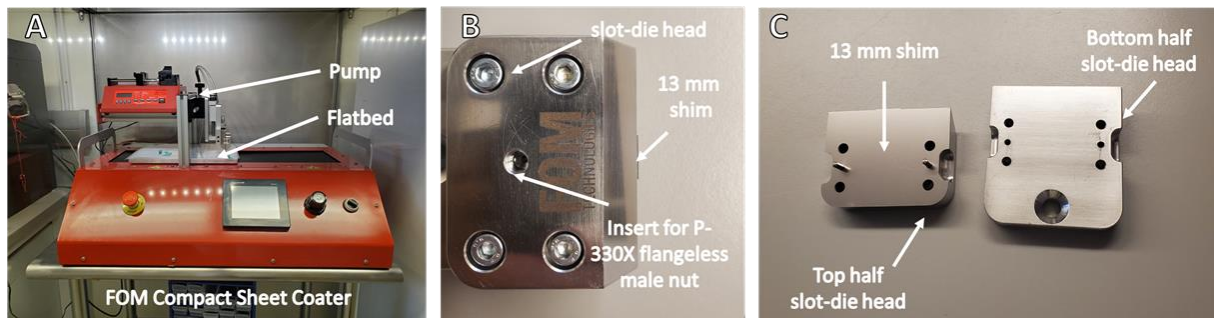

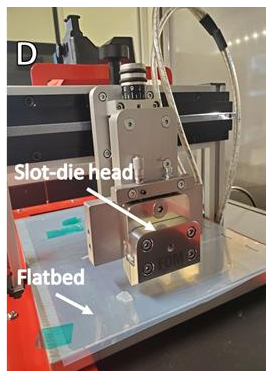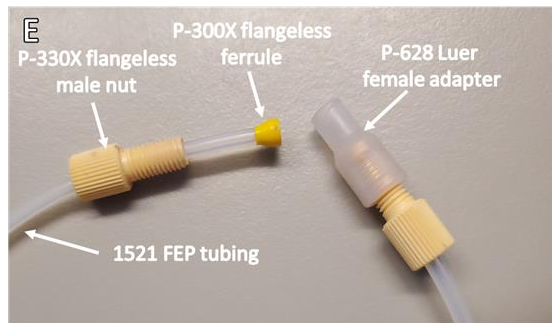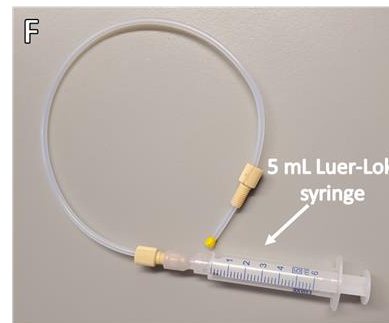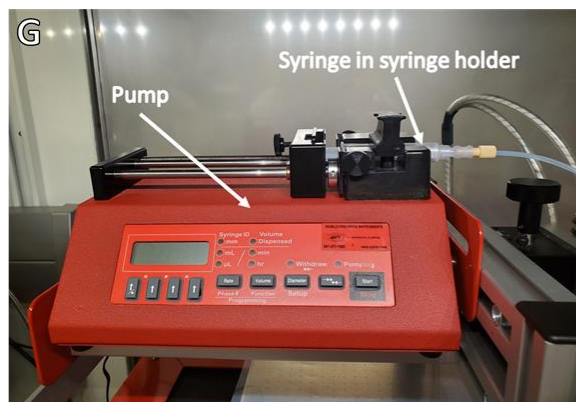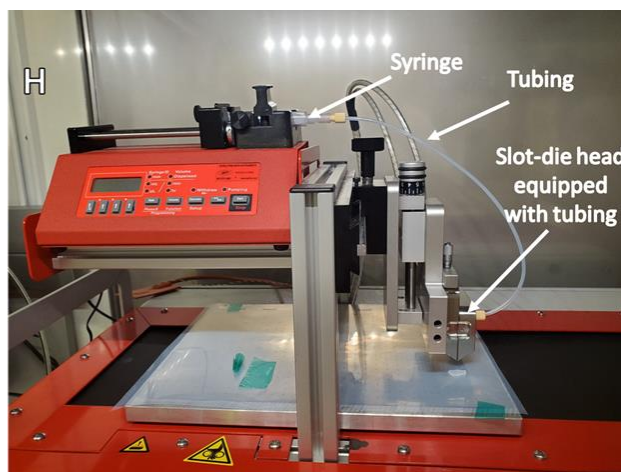

### Organic Photovoltaics:

**Material Preparation:** For ZnO sol–gel preparation, 197 mg zinc acetate was dissolved in a 6 mL ethanol plus 54  $\mu\text{L}$  ethanolamine while mixing at 45 °C and 650 rpm for 50 min. To prepare the PDIN-Na solution, 10 mg/ml of sodium hydroxide (NaOH) was dissolved in 1-propanol through stirring at 400 rpm for 30 min. Then, 0.162 mL of this solution was added to a mixture of 1-propanol (2 mL) and PDIN-H (10 mg) followed by stirring at 400 rpm for 30 min. The solution was filtered through a 0.22  $\mu\text{m}$  polypropylene filter prior to film formation. For the active layer, a 45 mg/ml solution of poly(3-hexylthiophene) (P3HT): [6,6]-Phenyl C<sub>61</sub> butyric acid methyl ester (PC<sub>60</sub>BM), (1:1), in dichlorobenzene was prepared by stirring at 100 °C and 650 rpm overnight inside the glovebox. The solution was filtered through a 0.22  $\mu\text{m}$  PTFE filter prior to film formation.

**Device Fabrication:** For OPV device fabrication, ITO-patterned glass substrates (Kintec) with a thickness of 80 nm and a sheet resistance of 15  $\Omega \text{ sq}^{-1}$  were used. The substrates were first cleaned via sequential ultrasonic cleaning using Micro 90, deionized water, acetone and isopropanol solutions, following 5 min of O<sub>2</sub> plasma treatment. For coating the electron transport layers (ETL), ZnO was spin-coated at 1000 rpm for 60 s and annealed at 150 °C for 30 min, and PDIN-Na solution was spin coated at 4000 rpm for 60 s followed by annealing at 120 °C for 10 min. The P3HT:PC<sub>60</sub>BM solution was spin coated at 1000 rpm for 80 s and thermally annealed at 150°C for 30 min inside the glovebox, resulting in a 150 nm thick bulk heterojunction (BHJ) active layer. The ITO-patterned substrate consisted of 12 OPVs with a surface area of 0.04 cm<sup>2</sup> of each. To compare the different ETLs more accurately, each substrate was first cut into four equal pieces, and the corresponding solution processes of each ETL were done on one piece. Then, the four pieces were taped together and transferred into an Angstrom Engineering EvoVac thermal evaporation chamber with a base pressure of 5  $\times 10^{-6}$  Torr for deposition of 5 nm of MoO<sub>3</sub> (American Elements), and 100 nm of aluminum anode (Angstrom Engineering).

**Material and Device Characterization:** Measurements of current density–voltage characteristics were carried out by a Keithley 2400 source, under 1-sun AM1.5G illumination from an ABET Sun 3000 Class AAA solar simulator. The external quantum efficiency (EQE) measurements were performed using the PV measurement (QEX10) system. The cells are illuminated under a monochromatic light, achieved through filtering a xenon arc lamp source, coupled with a germanium photodiode, by a dual-grating monochromator.

**Table S2. OPV Device parameters (champion)**

| ETL        | $J_{sc}$<br>( $\text{mA}/\text{cm}^2$ ) | $V_{oc}$ (mV) | FF [%] | PCE [%] |
|------------|-----------------------------------------|---------------|--------|---------|
| ZnO        | 7.0                                     | 663           | 60     | 2.8     |
| ZnO/PDIN-H | 6.9                                     | 652           | 59     | 2.7     |
| PDIN-H     | 6.8                                     | 646           | 53     | 2.3     |
| none       | 8.3                                     | 577           | 41     | 1.9     |

Device: Glass/ITO/ETL/P3HT:PC<sub>60</sub>BM/MoO<sub>3</sub>/Al

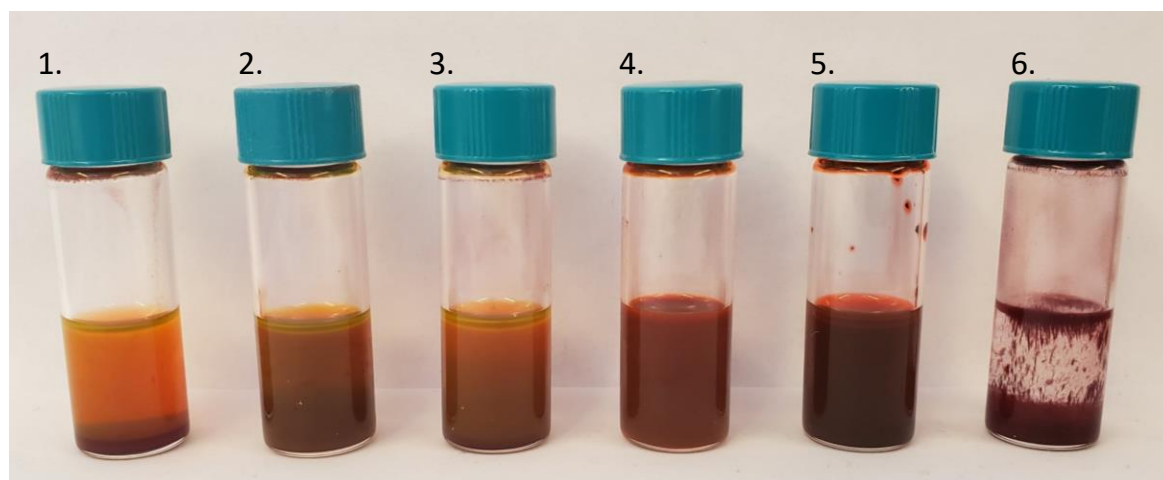

**Figure S1.** Mixtures of 5 mg/mL PDIN-H in various solvents to demonstrate the low solubility of the PDI-NH compound in: 1. 1-propanol, 2. Dichloromethane, 3. *o*-xylene, 4. Chloroform, 5. Dimethyl formamide, 6. Hexanes.

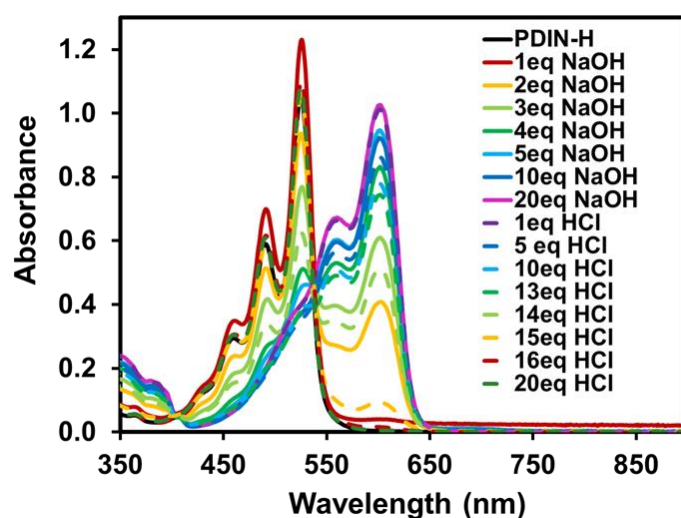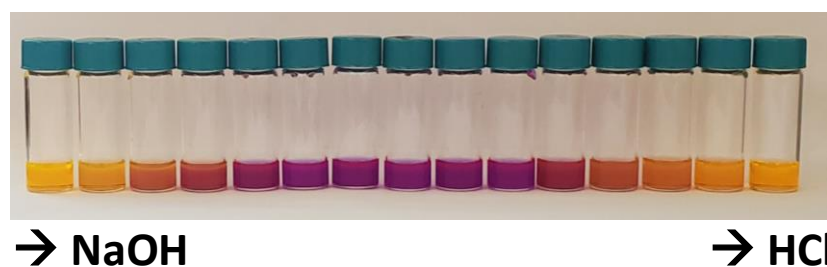

**Figure S2.** UV-vis spectra for 0.05 mg/mL PDIN-H solutions in n-propanol with molar equivalents of NaOH and HCl added sequentially. NaOH added PDIN-H followed by adding HCl to the formed PDIN- anion. This experiment shows that the deprotonation of PDIN-H is fully reversible. Pictures of the solutions shown.



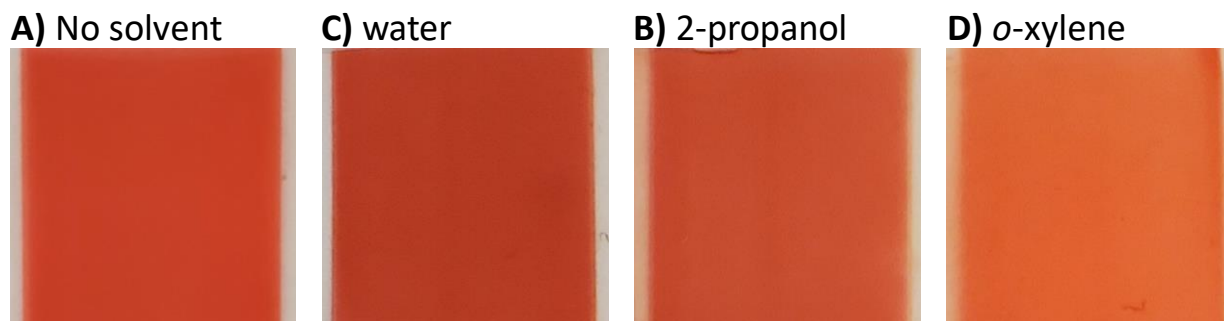

**Figure S3.** Photographs (1.5 cm x 1.5 cm) for PDIN-H slot-die coated films dipped in various solvents for 10 s and allowed to air dry. Films were formed by slot-die coating a solution of PDIN-H in 1-propanol (10 mg/mL) with 1 molar equivalent of NaOH added.

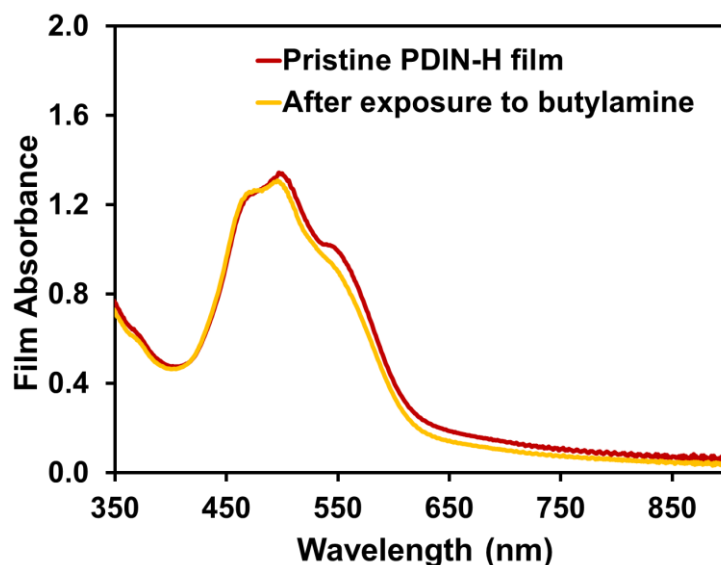

**Figure S4.** UV-vis spectra of slot-die coated PDIN-H from 1-propanol (10 mg/mL) with 1 molar equivalent of NaOH before and after exposure to butylamine vapor for 1 minute (1 mL of butylamine was deposited at the bottom of a closed container and the film was placed on a watch glass in this container – the film turned purple, after 1 minute the container was opened to remove all butylamine – the film turned red).

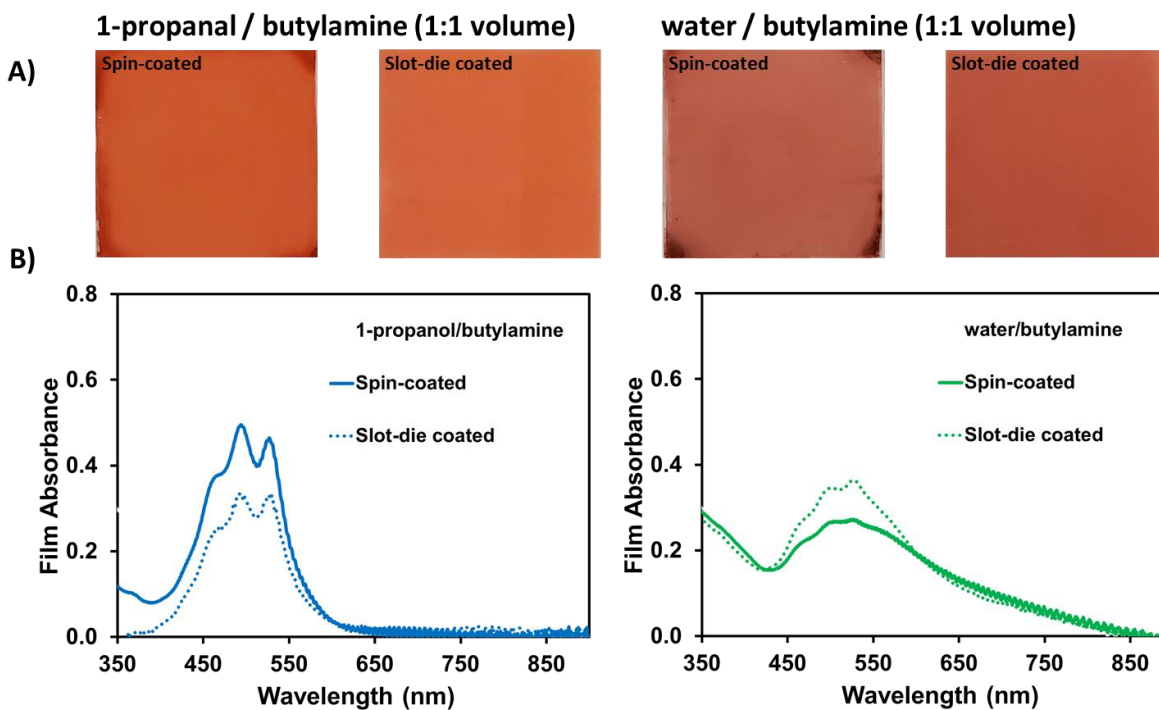

**Figure S5.** A) Top left to right, photographs (1.5 cm x 1.5 cm) – spin-coated PDIN-H in 1-propanol (10 mg/mL) with added volume equivalents of butylamine on PET. Slot-die coated PDIN-H in 1-propanol (10 mg/mL) with added volume equivalents of butylamine on PET. Spin-coated PDIN-H in water (10 mg/mL) with added volume equivalents of butylamine on PET. Slot-die coated PDIN-H in water (10 mg/mL) with added volume equivalents of butylamine on PET. B) UV-vis absorbance spectra of the above mentioned films.

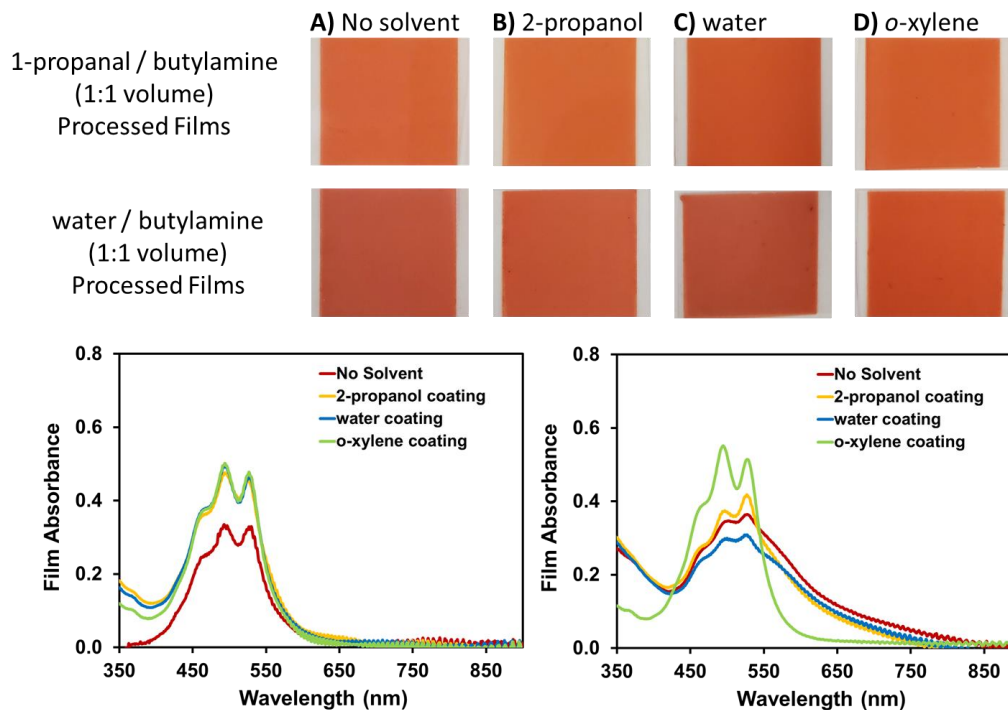

**Figure S6.** Photographs (1.5 cm x 15.cm, top), and UV-vis spectra (bottom) for PDIN-H films A) as-cast with no solvent coated on top and with B) 2-propanol, C) water, or D) *o*-xylene slot-die coated on top and left to dry. PDIN-H films formed via slot-die coating 10 mg/mL PDIN-H solutions in 1-propanol or water with 1 volumetric equivalent of butylamine added. Left UV-vis spectra show 1-propanol/butylamine films and right show water/butylamine films.

## Appendix S1

### Safety comment and hazards information

All slot-die coating was done under fume hood to prevent possible irritations, volatile solvents (alcohols and amines) were kept away from heat or open flame. Otherwise, no expected or unusually high safety hazards were encountered.

1-octanol

<https://pubchem.ncbi.nlm.nih.gov/compound/1-Octanol> accessed March 05, 2020

PubChem 1-Octanol (Compound)

12.1.1 GHS Classification  

Showing 1 of 5 View More 

|                               |                                                                                                                                                                                                                                                                                                                                                                                                                                                                                                                                                                                                                                                                                                                                                                                                                                                                                                                                                                                                     |
|-------------------------------|-----------------------------------------------------------------------------------------------------------------------------------------------------------------------------------------------------------------------------------------------------------------------------------------------------------------------------------------------------------------------------------------------------------------------------------------------------------------------------------------------------------------------------------------------------------------------------------------------------------------------------------------------------------------------------------------------------------------------------------------------------------------------------------------------------------------------------------------------------------------------------------------------------------------------------------------------------------------------------------------------------|
| Pictogram(s)                  |  <br>Irritant Environmental Hazard                                                                                                                                                                                                                                                                                                                                                                                                                                                                                                                                                                                                                                                                                                                                                                                                |
| Signal                        | Warning                                                                                                                                                                                                                                                                                                                                                                                                                                                                                                                                                                                                                                                                                                                                                                                                                                                                                                                                                                                             |
| GHS Hazard Statements         | Aggregated GHS information provided by 236 companies from 6 notifications to the ECHA C&L Inventory. Each notification may be associated with multiple companies.<br>Reported as not meeting GHS hazard criteria by 158 of 236 companies. For more detailed information, please visit <a href="#">ECHA C&amp;L website</a><br>Of the 3 notification(s) provided by 78 of 236 companies with hazard statement code(s):<br>H315 (100%): Causes skin irritation [Warning Skin corrosion/irritation]<br>H319 (92.31%): Causes serious eye irritation [Warning Serious eye damage/eye irritation]<br>H400 (91.03%): Very toxic to aquatic life [Warning Hazardous to the aquatic environment, acute hazard]<br>Information may vary between notifications depending on impurities, additives, and other factors. The percentage value in parenthesis indicates the notified classification ratio from companies that provide hazard codes. Only hazard codes with percentage values above 10% are shown. |
| Precautionary Statement Codes | P264, P273, P280, P302+P352, P305+P351+P338, P321, P332+P313, P337+P313, P362, P391, and P501<br>(The corresponding statement to each P-code can be found at the GHS Classification page.)                                                                                                                                                                                                                                                                                                                                                                                                                                                                                                                                                                                                                                                                                                                                                                                                          |

 European Chemicals Agency (ECHA)

1-nonanol

<https://pubchem.ncbi.nlm.nih.gov/compound/8914> accessed March 05, 2020

PubChem 1-Nonanol (Compound)

10 Safety and Hazards  

10.1 Hazards Identification  

10.1.1 GHS Classification  

Showing 1 of 2 View More 

|                               |                                                                                                                                                                                                                                                                                                                                                                                                                                                                                                                                                                                                                                                                                                                                                                                                                                                                                                                                                                                                                          |
|-------------------------------|--------------------------------------------------------------------------------------------------------------------------------------------------------------------------------------------------------------------------------------------------------------------------------------------------------------------------------------------------------------------------------------------------------------------------------------------------------------------------------------------------------------------------------------------------------------------------------------------------------------------------------------------------------------------------------------------------------------------------------------------------------------------------------------------------------------------------------------------------------------------------------------------------------------------------------------------------------------------------------------------------------------------------|
| Pictogram(s)                  |  <br>Irritant Environmental Hazard                                                                                                                                                                                                                                                                                                                                                                                                                                                                                                                                                                                                                                                                                                                                                                                                                 |
| Signal                        | Warning                                                                                                                                                                                                                                                                                                                                                                                                                                                                                                                                                                                                                                                                                                                                                                                                                                                                                                                                                                                                                  |
| GHS Hazard Statements         | Aggregated GHS information provided by 1856 companies from 10 notifications to the ECHA C&L Inventory. Each notification may be associated with multiple companies.<br>Reported as not meeting GHS hazard criteria by 8 of 1856 companies. For more detailed information, please visit <a href="#">ECHA C&amp;L website</a><br>Of the 9 notification(s) provided by 1848 of 1856 companies with hazard statement code(s):<br>H315 (14.45%): Causes skin irritation [Warning Skin corrosion/irritation]<br>H319 (100%): Causes serious eye irritation [Warning Serious eye damage/eye irritation]<br>H411 (81.39%): Toxic to aquatic life with long lasting effects [Hazardous to the aquatic environment, long-term hazard]<br>Information may vary between notifications depending on impurities, additives, and other factors. The percentage value in parenthesis indicates the notified classification ratio from companies that provide hazard codes. Only hazard codes with percentage values above 10% are shown. |
| Precautionary Statement Codes | P264, P273, P280, P302+P352, P305+P351+P338, P321, P332+P313, P337+P313, P362, P391, and P501<br>(The corresponding statement to each P-code can be found at the GHS Classification page.)                                                                                                                                                                                                                                                                                                                                                                                                                                                                                                                                                                                                                                                                                                                                                                                                                               |

## References

- (1) Bruker-AXS. SAINT; Madison, Wisconsin, USA, 2017.
- (2) Bruker-AXS. XPREP; Madison, Wisconsin, USA, 2017.
- (3) Dolomanov, O.V., Bourhis, L.J., Gildea, R.J., Howard, J.A.K. & Puschmann, H. (2009), *J. Appl. Cryst.* **42**, 339-341.
- (4) Sheldrick, G.M. (2015). *Acta Cryst.* **A71**, 3-8.
- (5) Sheldrick, G.M. (2015). *Acta Cryst.* **C71**, 3-8.
- (6) Frisch, M. J.; Trucks, G. W.; Schlegel, H. B.; Scuseria, G. E.; Robb, M. A.; Cheeseman, J. R.; Scalmani, G.; Barone, V.; Petersson, G. A.; Nakatsuji, H.; Li, X.; Caricato, M.; Marenich, A. V.; Bloino, J.; Janesko, B. G.; Gomperts, R.; Mennucci, B.; Hratchian, H. P.; Ortiz, J. V.; Izmaylov, A. F.; Sonnenberg, J. L.; Williams-Young, D.; Ding, F.; Lipparini, F.; Egidi, F.; Goings, J.; Peng, B.; Petrone, A.; Henderson, T.; Ranasinghe, D.; Zakrzewski, V. G.; J. Gao; Rega, N.; Zheng, G.; Liang, W.; Hada, M.; Ehara, M.; Toyota, K.; Fukuda, R.; Hasegawa, J.; Ishida, M.; Nakajima, T.; Honda, Y.; Kitao, O.; Nakai, H.; Vreven, T.; Throssell, K.; J. A. Montgomery, J.; Peralta, J. E.; Ogliaro, F.; Bearpark, M. J.; Heyd, J. J.; Brothers, E. N.; Kudin, K. N.; Staroverov, V. N.; Keith, T. A.; Kobayashi, R.; Normand, J.; Raghavachari, K.; Rendell, A. P.; Burant, J. C.; Iyengar, S. S.; Tomasi, J.; Cossi, M.; Millam, J. M.; Klene, M.; Adamo, C.; Cammi, R.; Ochterski, J. W.; Martin, R. L.; Morokuma, K.; Farkas, O.; Foresman, J. B.; Fox, a. D. J. *Gaussian 16, Revision A.03*, Gaussian, Inc.: Wallingford CT, 2016.
- (7) Zhao, Y.; Truhlar, D. G., The M06 suite of density functionals for main group thermochemistry, thermochemical kinetics, noncovalent interactions, excited states, and transition elements: two new functionals and systematic testing of four M06-class functionals and 12 other functionals. *Theoretical Chemistry Accounts* **2008**, *120* (1), 215-241.
- (8) Hariharan, P. C.; Pople, J. A., The influence of polarization functions on molecular orbital hydrogenation energies. *Theoretical Chemistry Accounts* **1973**, *28* (3), 213-222.
- (9) Petersson, G. A.; Bennett, A.; Tensfeldt, T. G.; AI-Laham, M. A.; Shirley, W. A.; Mantzaris, J., A complete basis set model chemistry. I. The total energies of closed-shell atoms and hydrides of the first-row elements *Journal of Chemical Physics* **1988**, *89* (4), 2193-2218.
- (10) Petersson, G. A.; AI-Laham, M. A., A complete basis set model chemistry. II. Open-shell systems and the total energies of the first-row atoms *Journal of Chemical Physics* **1991**, *94* (9), 6081-6090.
- (11) Marenich, A. V.; Cramer, C. J.; Truhlar, D. G., Universal Solvation Model Based on Solute Electron Density and on a Continuum Model of the Solvent Defined by the Bulk Dielectric Constant and Atomic Surface Tensions. *The Journal of Physical Chemistry B* **2009**, *113* (18), 6378-6396.
- (12) Dennington, R.; Keith, T. A.; Millam, J. M. *GaussView, Version 5.0.9*, Semichem Inc., Shawnee Mission: KS, **2009**.
- (13) Ho, J.; Zwicker, V. E.; Yuen, K. K. Y.; Jolliffe, K. A., Quantum Chemical Prediction of Equilibrium Acidities of Ureas, Deltamides, Squaramides, and Croconamides. *The Journal of Organic Chemistry* **2017**, *82* (19), 10732-10736.
- (14) Shields, G. C.; Seybold, P. G., *Computational Approaches for the Prediction of pKa Values*. 1st Edition; CRC Press: Boca Raton, Florida, **2013**.

- (15) Liptak, M. D.; Shields, G. C., Accurate pKa Calculations for Carboxylic Acids Using Complete Basis Set and Gaussian-n Models Combined with CPCM Continuum Solvation Methods. *Journal of the American Chemical Society* **2001**, *123* (30), 7314-7319.
- (16) Chipman, D. M., Computation of pKa from Dielectric Continuum Theory. *The Journal of Physical Chemistry A* **2002**, *106* (32), 7413-7422.
- (17) Ribeiro, R. F.; Marenich, A. V.; Cramer, C. J.; Truhlar, D. G., Use of Solution-Phase Vibrational Frequencies in Continuum Models for the Free Energy of Solvation. *The Journal of Physical Chemistry B* **2011**, *115* (49), 14556-14562.
- (18) Ho, J., Are thermodynamic cycles necessary for continuum solvent calculation of pKas and reduction potentials? *Physical Chemistry Chemical Physics* **2015**, *17* (4), 2859-2868.
- (19) Fifen, J. J.; Dhaouadi, Z.; Nsangou, M., Revision of the Thermodynamics of the Proton in Gas Phase. *The Journal of Physical Chemistry A* **2014**, *118* (46), 11090-11097.
- (20) Lee, S.; Cho, K.-H.; Lee, C. J.; Kim, G. E.; Na, C. H.; In, Y.; No, K. T., Calculation of the Solvation Free Energy of Neutral and Ionic Molecules in Diverse Solvents. *Journal of Chemical Information and Modeling* **2011**, *51* (1), 105-114.
- (21) Tehan, B. G.; Lloyd, E. J.; Wong, M. G.; Pitt, W. R.; Montana, J. G.; Manallack, D. T.; Gancia, E., Estimation of pKa Using Semiempirical Molecular Orbital Methods. Part 1: Application to Phenols and Carboxylic Acids. *Quantitative Structure-Activity Relationships* **2002**, *21* (5), 457-472.
- (22) Tehan, B. G.; Lloyd, E. J.; Wong, M. G.; Pitt, W. R.; Gancia, E.; Manallack, D. T., Estimation of pKa Using Semiempirical Molecular Orbital Methods. Part 2: Application to Amines, Anilines and Various Nitrogen Containing Heterocyclic Compounds. *Quantitative Structure-Activity Relationships* **2002**, *21* (5), 473-485.
